# Supplementary material for: Deep Profiling of Mouse Splenic Architecture with CODEX Multiplexed Imaging
Source: PubMed Central journal article supplement (PMC6086938; doi:10.1016/j.cell.2018.07.010), 2018-08-09
Supplement: mmc4.pdf [file mmc4.pdf]

F and Pr(>F) values for niche contribution in fitting surface marker expression with a regression model

Marker\_expression~factor(celltype)+factor(niche\_ID)

|                | F values   | Pr(>F)    |
|----------------|------------|-----------|
| <b>B220</b>    | 394.713564 | 0         |
| <b>CD21/35</b> | 344.790481 | 0         |
| <b>ERTR7</b>   | 319.034053 | 0         |
| <b>CD90</b>    | 296.257425 | 0         |
| <b>CD35</b>    | 275.720623 | 0         |
| <b>F480</b>    | 196.705914 | 0         |
| <b>CD169</b>   | 178.874821 | 0         |
| <b>CD106</b>   | 115.018257 | 0         |
| <b>CD19</b>    | 103.935024 | 0         |
| <b>IgD</b>     | 88.3376641 | 0         |
| <b>CD44</b>    | 84.3808551 | 0         |
| <b>Ter119</b>  | 81.3449664 | 0         |
| <b>CD4</b>     | 74.6449407 | 0         |
| <b>CD1632</b>  | 68.9150189 | 0         |
| <b>CD79b</b>   | 68.061559  | 0         |
| <b>NKp46</b>   | 67.5885479 | 0         |
| <b>CD31</b>    | 60.6522302 | 0         |
| <b>CD45</b>    | 46.7246424 | 0         |
| <b>IgM</b>     | 45.2642992 | 0         |
| <b>CD27</b>    | 44.2520023 | 0         |
| <b>CD3</b>     | 40.4464091 | 0         |
| <b>CD71</b>    | 36.7131408 | 0         |
| <b>Ly6C</b>    | 32.3546739 | 0         |
| <b>CD8a</b>    | 31.1428799 | 0         |
| <b>CD11c</b>   | 26.8863317 | 0         |
| <b>TCR</b>     | 18.3387956 | 0.00E+00  |
| <b>CD11b</b>   | 15.014675  | 7.13E-243 |
| <b>CD5</b>     | 15.0026102 | 1.24E-242 |
| <b>Ly6G</b>    | 9.22206121 | 2.72E-130 |
